# Supplementary material
Source: PubMed Central journal article supplement (PMC1472522)
Supplement: pnas_0509307103_3.pdf [file pnas_0509307103_3.pdf]

**A****CD8<sup>+</sup> T cells**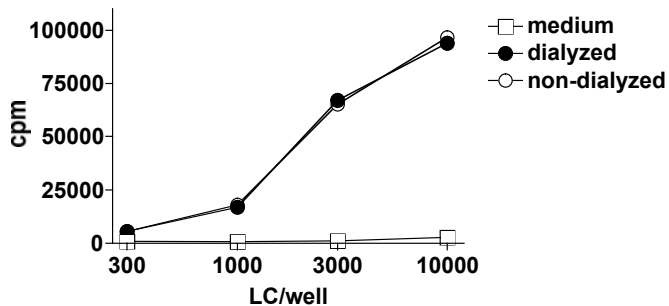**B****CD8<sup>+</sup> T cells**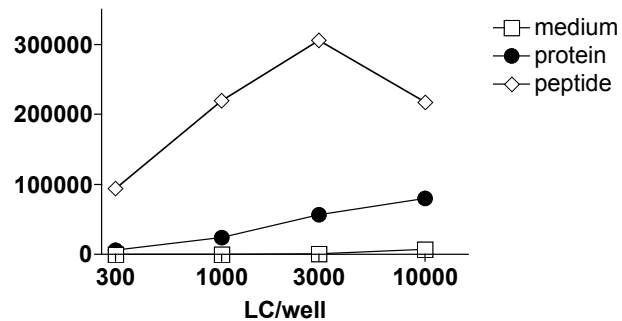**C****FACS on d0**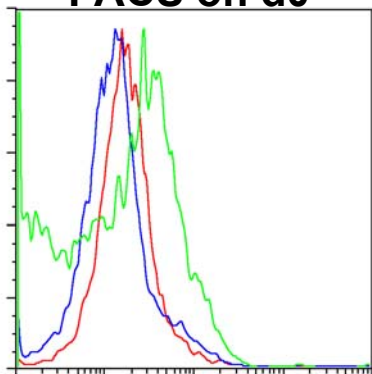**D****FACS on d3**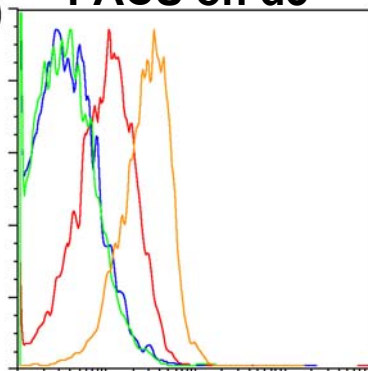

*red, unpulsed LC*  
*green, peptide pulse on d0*  
*blue, protein pulse on d0*  
*orange, peptide pulse on d3*

**25D1.16**
