# Supplementary material
Source: PubMed Central journal article supplement (PMC1472522)

### CD8<sup>+</sup> T cells

- medium
- △ ova 1h
- ▽ ova 6h
- ova 24h

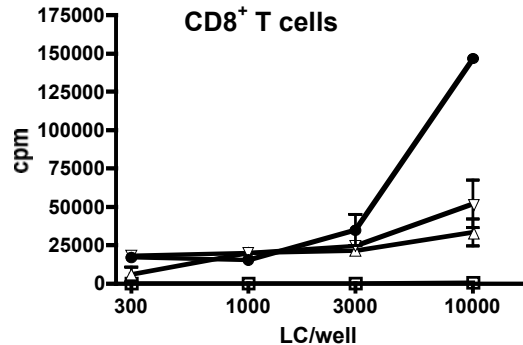

### CD4<sup>+</sup> T cells

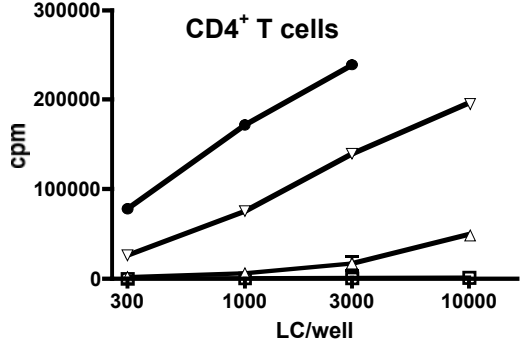

Supplement: pnas_0509307103_1.pdf [file pnas_0509307103_1.pdf]

Relative absorbance at 210 nM

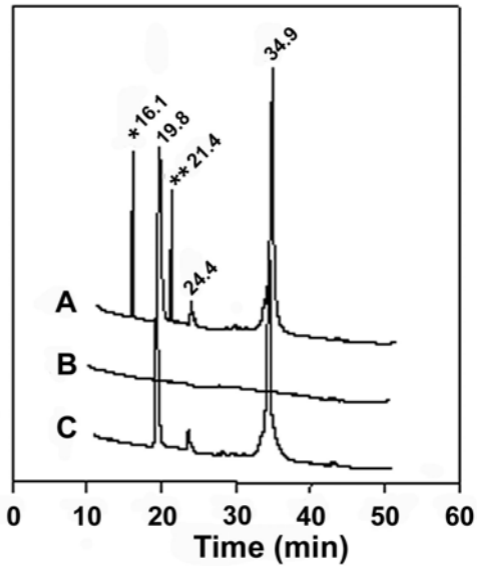

Supplement: pnas_0509307103_2.pdf [file pnas_0509307103_2.pdf]
